# Supplementary material for: Eco-friendly synthesis of activated carbon from dead mango leaves for the ultrahigh sensitive detection of toxic heavy metal ions and energy storage applications
Source: Royal Society of Chemistry journal article supplement (doi:10.1039/c3ra45089a), 2013-10-29
Supplement: c3ra45089a.pdf [file c3ra45089a.pdf]

## Supplementary Information

### **Eco-friendly synthesis of activated carbon from dead mango leaves for the detection of toxic heavy metal ions and energy storage applications**

**Rajesh Madhu<sup>a</sup>, Kalimuthu Vijaya Sankar<sup>b</sup>, Shen-Ming Chen<sup>a\*</sup>, and Ramakrishnan Kalai Selvan<sup>b\*</sup>**

*Electroanalysis and Bioelectrochemistry Lab, Department of Chemical Engineering and Biotechnology, National Taipei University of Technology, No.1, Section 3, Chung-Hsiao East Road, Taipei 106, Taiwan.*

*Solid State Ionics and Energy Devices Laboratory, Department of Physics, Bharathiar University, Coimbatore – 641 046, Tamil Nadu, India.*

**E-mail:** smchen78@ms15.hinet.net

: selvankram@buc.edu.in

†Electronic Supplementary Information (ESI) available: [details of any supplementary information available should be included here]. See DOI: 10.1039/b000000x/

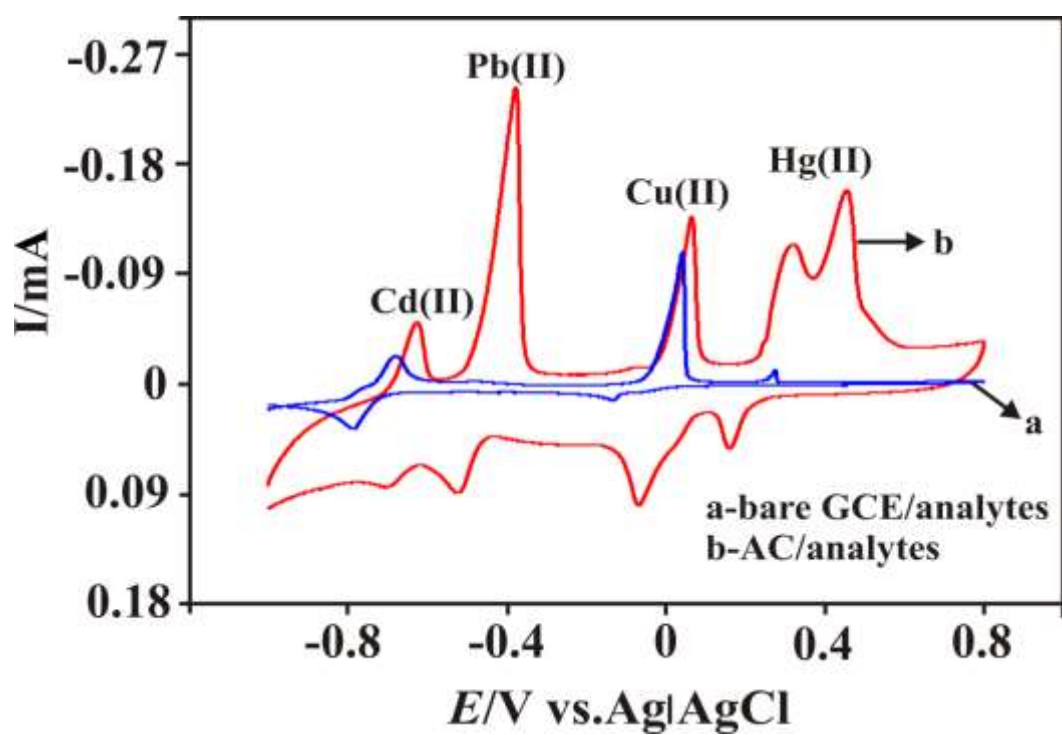

**Fig. S1** (a) Bare GCE (blue line) and (b) SNACs-modified GCE (red line) in 50  $\mu\text{M}$  each of Cd(II), Pb(II), Cu(II) and Hg(II).

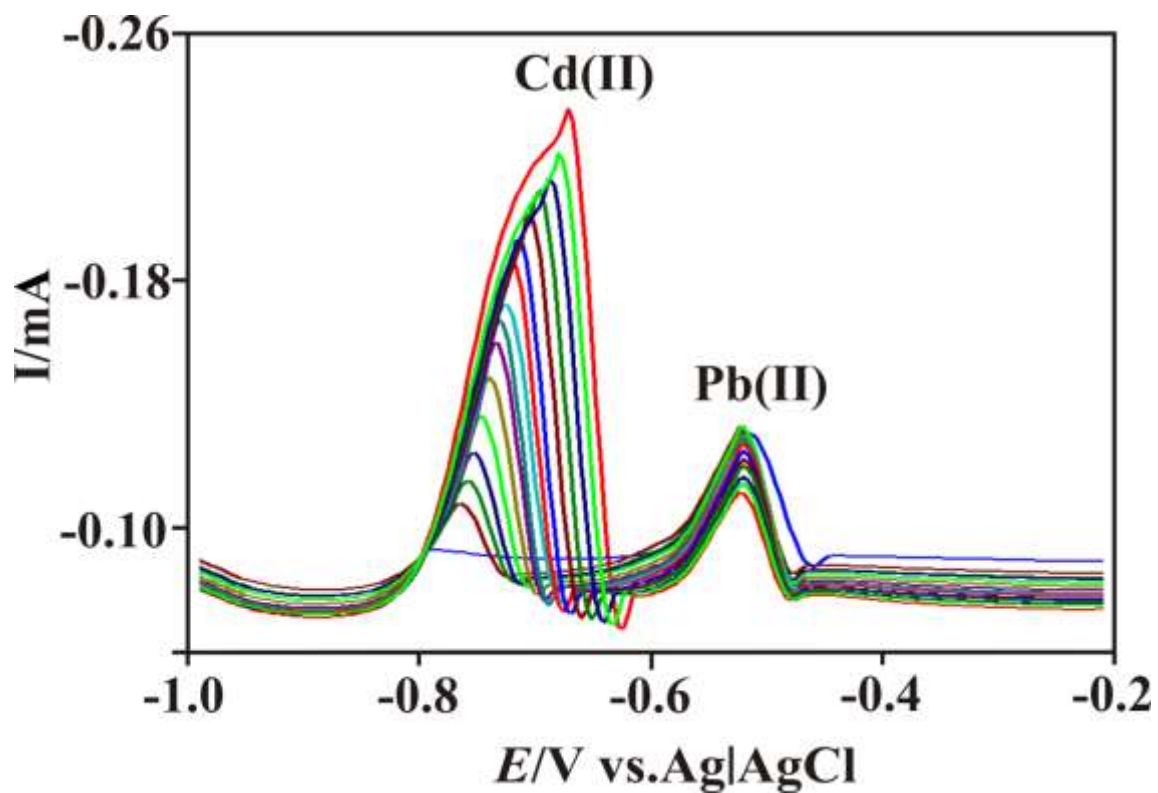

**Fig. S2** Increasing concentration of Cd(II) from 0 to 9.3  $\mu\text{M}$  in the presence of 1  $\mu\text{M}$  Pb(II) in 0.1 M NaAc-HAc (pH 5.0).

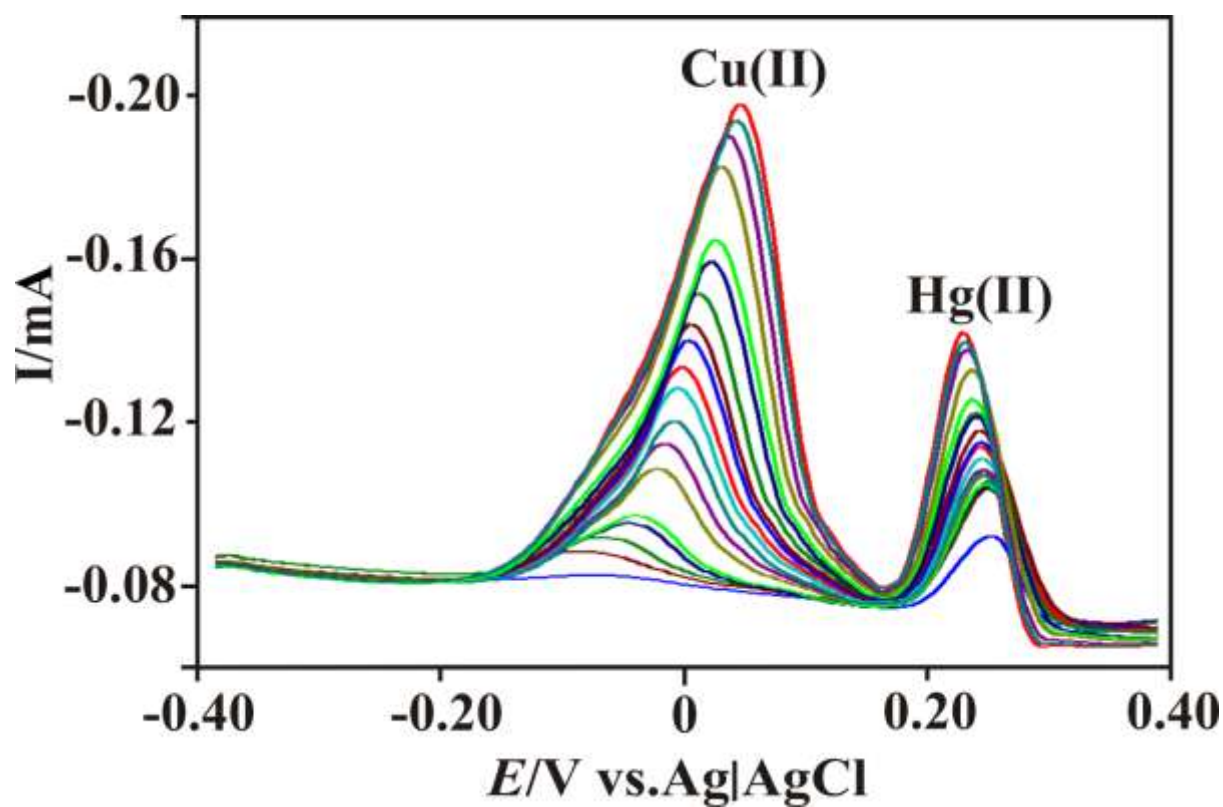

**Fig. S3** Increasing concentration of Cu(II) from 0 to 7.2  $\mu\text{M}$  in the presence of 1  $\mu\text{M}$  Hg(II) in 0.1 M NaAc-HAc (pH 5.0).

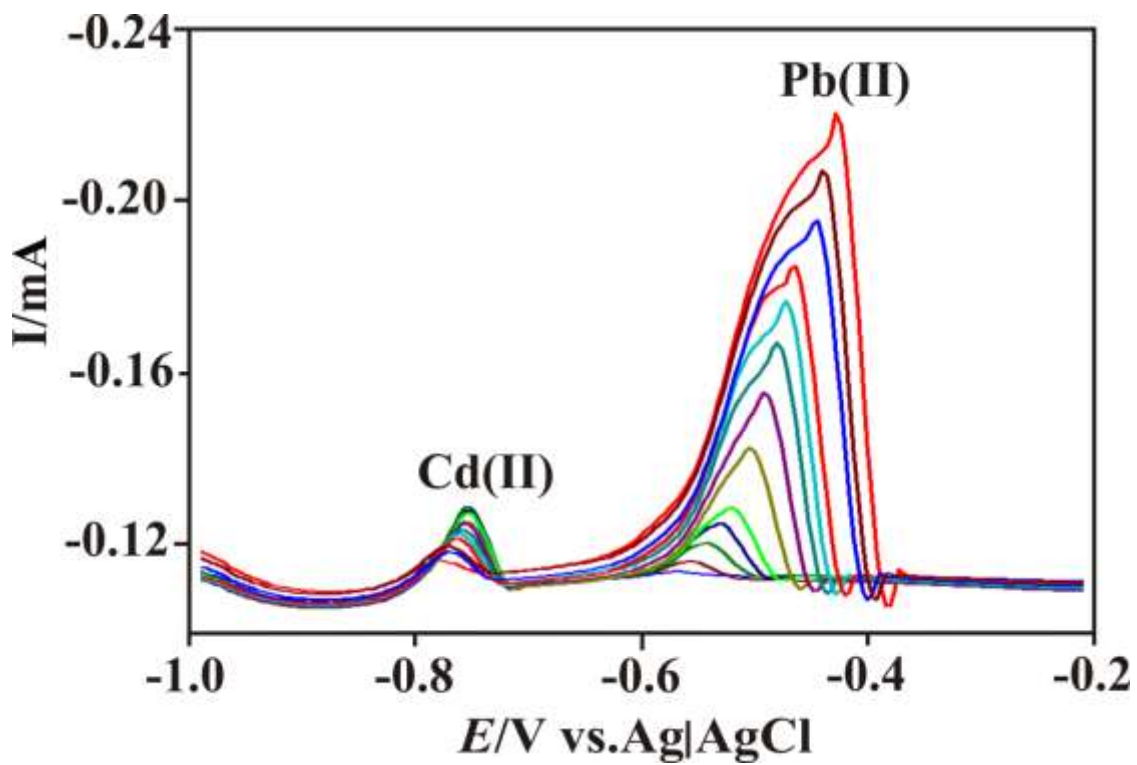

**Fig. S4** Increasing concentration of Pb(II) from 0 to 10.43  $\mu$ M in the presence of 1  $\mu$ M Cd(II) in 0.1 M NaAc-HAc (pH 5.0).
